# Supplementary material
Source: PubMed Central journal article supplement (PMC11028255)
Supplement: 262_2018_2150_MOESM1_ESM.pdf [file 262_2018_2150_MOESM1_ESM.pdf]

**Supplementary Table 1:** List of immune cell types quantified by the methods for which novel gene sets or expression signatures were made available in the original publication (full references in the main text).

|                                      |                                                                                                                                                                                                                                                                                                                                                                                                                                                                                                                                                                                                                                                                                                                                                                                                                                                                                                                                                                                                                                                                                                                                                                                                                                                                                                                                                                                                                                                         |
|--------------------------------------|---------------------------------------------------------------------------------------------------------------------------------------------------------------------------------------------------------------------------------------------------------------------------------------------------------------------------------------------------------------------------------------------------------------------------------------------------------------------------------------------------------------------------------------------------------------------------------------------------------------------------------------------------------------------------------------------------------------------------------------------------------------------------------------------------------------------------------------------------------------------------------------------------------------------------------------------------------------------------------------------------------------------------------------------------------------------------------------------------------------------------------------------------------------------------------------------------------------------------------------------------------------------------------------------------------------------------------------------------------------------------------------------------------------------------------------------------------|
| <i>Abbas et al.</i>                  | Resting helper T cells, activated helper T cells, resting cytotoxic T cells, activated cytotoxic T cells, resting B cells, activated B cells, IgM memory B cells, IgA/IgG memory B cells, plasma cells, resting natural killer cells, activated natural killer cells, monocytes, activated monocytes, macrophages, resting dendritic cells, activated dendritic cells, neutrophils.                                                                                                                                                                                                                                                                                                                                                                                                                                                                                                                                                                                                                                                                                                                                                                                                                                                                                                                                                                                                                                                                     |
| <i>Newman et al.</i><br>CIBERSORT    | Naïve CD4 <sup>+</sup> T cells, resting memory CD4 <sup>+</sup> T cells, activated memory CD4 <sup>+</sup> T cells, follicular helper T cells, gamma-delta T cells, CD4 <sup>+</sup> regulatory T cells, CD8 <sup>+</sup> T cells, resting natural killer cells, activated natural killer cells, naïve B cells, memory B cells, plasma cells, monocytes, unstimulated (M0) macrophages, classically activated (M1) macrophages, alternatively activated (M2) macrophages, resting mast cells, activated mast cells, resting dendritic cells, activated dendritic cells, neutrophils, eosinophils.                                                                                                                                                                                                                                                                                                                                                                                                                                                                                                                                                                                                                                                                                                                                                                                                                                                       |
| <i>Angelova et al.</i><br>TIminer    | Activated B cells, activated CD4 <sup>+</sup> T cells, activated CD8 <sup>+</sup> T cells, central memory CD4 <sup>+</sup> T cells, central memory CD8 <sup>+</sup> T cells, effector memory CD4 <sup>+</sup> T cells, effector memory CD8 <sup>+</sup> T cells, cytotoxic cells, gamma-delta T cells, immature B cells, memory B cells, regulatory T cells, follicular helper T cells, type 1 helper T cells, type 17 helper T cells, type 2 helper T cells, CD56 <sup>bright</sup> natural killer cells, CD56 <sup>dim</sup> natural killer cells, eosinophils, immature dendritic cells, macrophages, mast cells, myeloid-derived suppressor cells, monocytes, natural killer cells, natural killer T cells, neutrophils, plasmacytoid dendritic cells, dendritic cells, myeloid dendritic cells, T cells.                                                                                                                                                                                                                                                                                                                                                                                                                                                                                                                                                                                                                                           |
| <i>Aran et al.</i><br>xCell, TIminer | Activated dendritic cells, adipocytes, alternatively activated macrophages (M2), astrocytes, B cells, basophils, classically activated macrophages (M1), CD4 <sup>+</sup> central memory T cells, CD4 <sup>+</sup> effector memory T cells, CD4 <sup>+</sup> memory T cells, CD4 <sup>+</sup> naïve T cells, CD4 <sup>+</sup> T cells, CD8 <sup>+</sup> central memory T cells, CD8 <sup>+</sup> effector memory T cells, CD8 <sup>+</sup> naïve T cells, CD8 <sup>+</sup> T cells, chondrocytes, class-switched memory B cells, common lymphoid progenitors, common myeloid progenitors, conventional dendritic cells, dendritic cells, endothelial cells, eosinophils, epithelial cells, erythrocytes, fibroblasts, gamma-delta T cells, granulocytes, macrophage progenitors, hematopoietic stem cells, hepatocytes, immature dendritic cells, keratinocytes, lymphatic endothelial cells, macrophages, mast cells, megakaryocyte–erythroid progenitors, megakaryocytes, melanocytes, memory B cells, mesangial cells, mesenchymal stem cells, microvascular endothelial cells, monocytes, multipotent progenitors, myocytes, naïve B cells, natural killer cells, natural killer T cells, neurons, neutrophils, osteoblasts, pericytes, plasma cells, plasmacytoid dendritic cells, platelets, preadipocytes, pro B cells, regulatory T cells, sebocytes, skeletal muscle cells, smooth muscle cells, type 1 helper T cells, type 2 helper T cells. |
| <i>Becht et al.</i><br>MCP-counter   | T cells, CD8 <sup>+</sup> T cells, cytotoxic lymphocytes, natural killer cells, B cells, cells from monocytic lineage, myeloid dendritic cells, neutrophils, endothelial cells, fibroblasts.                                                                                                                                                                                                                                                                                                                                                                                                                                                                                                                                                                                                                                                                                                                                                                                                                                                                                                                                                                                                                                                                                                                                                                                                                                                            |
| <i>Charoentong et al.</i><br>TIminer | Activated B cells, activated CD4 <sup>+</sup> T cells, activated CD8 <sup>+</sup> T cells, central memory CD4 <sup>+</sup> T cells, central memory CD8 <sup>+</sup> T cells, effector memory CD4 <sup>+</sup> T cells, effector memory CD8 <sup>+</sup> T cells, gamma-delta T cells, immature B cells, memory B cells, regulatory T cells, T follicular helper cells, type 1 helper T cells, type 17 helper T cells, type 2 helper T cells, activated dendritic cells, CD56 <sup>bright</sup> natural killer cells, CD56 <sup>dim</sup> natural killer cells, eosinophils, immature dendritic cells, macrophages, mast cells, myeloid-derived suppressor cells, monocytes, natural killer cells, natural killer T cells, neutrophils, plasmacytoid dendritic cells.                                                                                                                                                                                                                                                                                                                                                                                                                                                                                                                                                                                                                                                                                    |
| <i>Finotello et al.</i><br>quanTIseq | B cells, monocytes, classically activated (M1) macrophages, alternatively activated (M2) macrophages, neutrophils, natural killer cells, CD4 <sup>+</sup> T cells, CD8 <sup>+</sup> T cells, CD4 <sup>+</sup> regulatory T cells, dendritic cells, other uncharacterized cells.                                                                                                                                                                                                                                                                                                                                                                                                                                                                                                                                                                                                                                                                                                                                                                                                                                                                                                                                                                                                                                                                                                                                                                         |
| <i>Li et al.</i><br>TIMER            | Dendritic cells, macrophages, neutrophils, CD8 <sup>+</sup> T cells, CD4 <sup>+</sup> T cells, B cells.                                                                                                                                                                                                                                                                                                                                                                                                                                                                                                                                                                                                                                                                                                                                                                                                                                                                                                                                                                                                                                                                                                                                                                                                                                                                                                                                                 |
| <i>Racle et al.</i><br>EPIC (blood)  | B cells, CD4 <sup>+</sup> T cells, CD8 <sup>+</sup> T cells, monocytes, neutrophils, natural killer cells, other uncharacterized cells.                                                                                                                                                                                                                                                                                                                                                                                                                                                                                                                                                                                                                                                                                                                                                                                                                                                                                                                                                                                                                                                                                                                                                                                                                                                                                                                 |
| <i>Racle et al.</i><br>EPIC (tumor)  | B cells, CD4 <sup>+</sup> T cells, CD8 <sup>+</sup> T cells, macrophages, natural killer cells, endothelial cells, cancer-associated fibroblasts, other uncharacterized cells.                                                                                                                                                                                                                                                                                                                                                                                                                                                                                                                                                                                                                                                                                                                                                                                                                                                                                                                                                                                                                                                                                                                                                                                                                                                                          |
